# Supplementary material for: Spectroscopic Characterization of Omeprazole and Its Salts
Source: Hindawi journal article supplement (doi:10.1155/2017/6505706), 2017-01-01
Supplement: f1 [file 6505706.f1.pdf]

Initial structure of OMP:

86

generated by VMD

|   |           |           |          |
|---|-----------|-----------|----------|
| N | 3.771554  | 0.837824  | 5.606754 |
| N | -2.633097 | 6.048390  | 4.258596 |
| N | 2.308138  | 2.315110  | 6.503703 |
| N | -1.169679 | 4.571104  | 3.361647 |
| N | -0.979185 | -0.345334 | 3.355810 |
| N | 2.117643  | 7.231548  | 6.509541 |
| H | 4.097772  | -0.002745 | 5.087189 |
| H | -2.959313 | 6.888959  | 4.778162 |
| H | 3.360426  | 4.699407  | 7.676131 |
| H | -2.221968 | 2.186807  | 2.189220 |
| H | -4.006973 | 5.096618  | 7.751964 |
| H | 5.145432  | 1.789596  | 2.113387 |
| H | -3.231805 | 1.331531  | 5.755560 |
| H | 4.370263  | 5.554684  | 4.109790 |
| H | 1.374751  | 1.352085  | 3.288760 |
| H | -0.236294 | 5.534128  | 6.576591 |
| H | 2.342208  | -0.147995 | 3.371492 |
| H | -1.203750 | 7.034207  | 6.493859 |
| H | 2.251932  | 8.659158  | 3.185429 |
| H | -1.113474 | -1.772943 | 6.679921 |
| H | 2.348159  | -0.216661 | 0.921390 |
| H | -1.209701 | 7.102875  | 8.943961 |
| H | -2.719068 | 7.795626  | 0.054828 |
| H | 3.857526  | -0.909412 | 9.810523 |

|   |           |           |          |
|---|-----------|-----------|----------|
| H | -2.026226 | 7.696866  | 1.690598 |
| H | 3.164684  | -0.810653 | 8.174752 |
| H | -1.936277 | 4.872894  | 9.617558 |
| H | 3.074735  | 2.013320  | 0.247793 |
| H | 1.237994  | 7.636951  | 1.276633 |
| H | -0.099536 | -0.750738 | 8.588717 |
| H | 2.153547  | 6.163002  | 0.920125 |
| H | -1.015090 | 0.723211  | 8.945225 |
| H | 5.979829  | 5.504379  | 0.536457 |
| H | -4.841370 | 1.381835  | 9.328894 |
| H | 1.190712  | 2.718915  | 8.750191 |
| H | -0.052254 | 4.167297  | 1.115160 |
| H | 4.233587  | 5.173156  | 0.337997 |
| H | -3.095129 | 1.713058  | 9.527353 |
| H | -1.295226 | 1.688029  | 6.907297 |
| H | 2.433685  | 5.198184  | 2.958053 |
| H | -0.220772 | 3.083862  | 6.599760 |
| H | 1.359230  | 3.802351  | 3.265590 |
| H | -1.330849 | 2.508477  | 5.314569 |
| H | 2.469308  | 4.377736  | 4.550781 |
| C | 2.460806  | 1.177815  | 5.840623 |
| C | -1.322347 | 5.708398  | 4.024727 |
| C | 3.600817  | 2.771921  | 6.697652 |
| C | -2.462358 | 4.114293  | 3.167697 |
| C | -5.780372 | 3.960450  | 7.289983 |
| C | 6.918830  | 2.925762  | 2.575367 |
| C | -4.413951 | 4.179112  | 7.327008 |

|   |           |           |          |
|---|-----------|-----------|----------|
| C | 5.552411  | 2.707102  | 2.538342 |
| C | -3.495810 | 3.234484  | 6.791220 |
| C | 4.634268  | 3.651730  | 3.074131 |
| C | -3.924767 | 2.048678  | 6.191682 |
| C | 5.063225  | 4.837535  | 3.673668 |
| C | 4.533780  | 1.849467  | 6.149356 |
| C | -3.395320 | 5.036747  | 3.715994 |
| C | 1.347436  | 0.281667  | 3.549689 |
| C | -0.208978 | 6.604548  | 6.315661 |
| C | 0.245028  | -0.437961 | 2.812482 |
| C | 0.893430  | 7.324174  | 7.052868 |
| C | -4.085958 | 8.358578  | 1.616628 |
| C | 5.224416  | -1.472366 | 8.248723 |
| C | 4.659923  | 7.756090  | 0.977350 |
| C | -3.521463 | -0.869877 | 8.888000 |
| C | 3.362910  | 7.859879  | 1.512886 |
| C | -2.224451 | -0.973666 | 8.352464 |
| C | 3.237592  | 8.563526  | 2.715447 |
| C | -2.099134 | -1.677312 | 7.149903 |
| C | -2.699825 | 8.274302  | 1.039068 |
| C | 3.838283  | -1.388087 | 8.826282 |
| C | 2.166790  | 7.260022  | 0.829977 |
| C | -1.028332 | -0.373808 | 9.035373 |
| C | 0.999416  | 3.087991  | 9.764427 |
| C | 0.139042  | 3.798223  | 0.100924 |
| C | -1.210645 | 2.659023  | 6.397906 |
| C | 2.349104  | 4.227191  | 3.467444 |

|   |           |           |          |
|---|-----------|-----------|----------|
| O | -2.177350 | 3.588490  | 6.905843 |
| O | 3.315809  | 3.297724  | 2.959507 |
| O | 1.273794  | -1.219551 | 5.781621 |
| O | -0.135336 | 8.105765  | 4.083730 |
| O | 0.745605  | 4.503123  | 9.637542 |
| O | 0.392853  | 2.383090  | 0.227809 |
| S | 1.035398  | 0.220694  | 5.356750 |
| S | 0.103060  | 6.665519  | 4.508601 |

Optimized structure of OMP:

86

|   |            |            |            |
|---|------------|------------|------------|
| N | 3.7879350  | 0.8902280  | 5.5876030  |
| N | -2.5922410 | 6.1165930  | 4.1856230  |
| N | 2.3342020  | 2.3866410  | 6.4684490  |
| N | -1.1385080 | 4.6201800  | 3.3047770  |
| N | -0.9737610 | -0.2968580 | 3.3620210  |
| N | 2.1694550  | 7.3036790  | 6.4112050  |
| H | 4.1086300  | 0.0413220  | 5.0782560  |
| H | -2.9129360 | 6.9654990  | 4.6949700  |
| H | 3.4014740  | 4.7802940  | 7.6078010  |
| H | -2.2057790 | 2.2265260  | 2.1654250  |
| H | -3.9635660 | 5.2172060  | 7.6938410  |
| H | 5.1592600  | 1.7896140  | 2.0793850  |
| H | -3.2124090 | 1.4226530  | 5.7446060  |
| H | 4.4081030  | 5.5841680  | 4.0286200  |
| H | 1.3888780  | 1.3871470  | 3.2681590  |
| H | -0.1931840 | 5.6196740  | 6.5050670  |
| H | 2.3486450  | -0.1168100 | 3.3682370  |
| H | -1.1529510 | 7.1236310  | 6.4049890  |
| H | 6.8579180  | -0.8247540 | 3.1815950  |
| H | -5.6622240 | 7.8315750  | 6.5916310  |
| H | 2.3489690  | -0.2171080 | 0.9192180  |
| H | -1.1532750 | 7.2239290  | 8.8540080  |
| H | -2.6781050 | 7.8098830  | -0.0401660 |
| H | 3.8737990  | -0.8030620 | 9.8133920  |

|   |            |            |           |
|---|------------|------------|-----------|
| H | -1.9822740 | 7.7285890  | 1.5952970 |
| H | 3.1779680  | -0.7217680 | 8.1779290 |
| H | -1.8900630 | 5.0066770  | 9.5578520 |
| H | 3.0857570  | 2.0001440  | 0.2153740 |
| H | 1.2806910  | 7.6461660  | 1.1753420 |
| H | -0.0849970 | -0.6393450 | 8.5978830 |
| H | 2.1877480  | 6.1629440  | 0.8359890 |
| H | -0.9920540 | 0.8438770  | 8.9372370 |
| H | 6.0096960  | 5.4793040  | 0.4528900 |
| H | -4.8140020 | 1.5275170  | 9.3203360 |
| H | 1.2237390  | 2.8252670  | 8.7118570 |
| H | -0.0280440 | 4.1815540  | 1.0613690 |
| H | 4.2613230  | 5.1547400  | 0.2623600 |
| H | -3.0656290 | 1.8520810  | 9.5108660 |
| H | -1.2715190 | 1.7837850  | 6.8876090 |
| H | 2.4672130  | 5.2230360  | 2.8856170 |
| H | -0.1904370 | 3.1698630  | 6.5598390 |
| H | 1.3861310  | 3.8369580  | 3.2133870 |
| H | -1.3062710 | 2.5837950  | 5.2844980 |
| H | 2.5019660  | 4.4230250  | 4.4887270 |
| C | 2.4794890  | 1.2400990  | 5.8197920 |
| C | -1.2837950 | 5.7667220  | 3.9534340 |
| C | 3.6296670  | 2.8391080  | 6.6537930 |
| C | -2.4339730 | 4.1677120  | 3.1194330 |
| C | -5.7438760 | 4.0845210  | 7.2502620 |
| C | 6.9395710  | 2.9223000  | 2.5229640 |
| C | -4.3762530 | 4.2964490  | 7.2816160 |

C 5.5719480 2.7103720 2.4916100  
C -3.4642220 3.3401710 6.7561570  
C 4.6599170 3.6666500 3.0170680  
C -3.9006690 2.1490020 6.1728740  
C 5.0963630 4.8578190 3.6003510  
C 4.5566080 1.9047620 6.1155110  
C -3.3609140 5.1020590 3.6577150  
C 1.3565210 0.3203420 3.5429430  
C -0.1608270 6.6864790 6.2302830  
C 0.2487790 -0.4029260 2.8173860  
C 0.9469150 7.4097470 6.9558390  
C -4.0386690 8.4001200 1.5170780  
C 5.2343630 -1.3932990 8.2561480  
C 4.7025440 7.7434290 0.8674210  
C -3.5068490 -0.7366080 8.9058050  
C 3.4072470 7.8609410 1.4042720  
C -2.2115530 -0.8541200 8.3689540  
C 3.2882000 8.5806910 2.5979060  
C -2.0925060 -1.5738700 7.1753190  
C -2.6542400 8.3011060 0.9377690  
C 3.8499340 -1.2942860 8.8354560  
C 2.2065380 7.2586240 0.7316570  
C -1.0108440 -0.2518030 9.0415690  
C 1.0365580 3.2083960 9.7216400  
C 0.1591370 3.7984250 0.0515860  
C -1.1829520 2.7476690 6.3655490  
C 2.3786470 4.2591520 3.4076770

O -2.1436850 3.6886840 6.8634550  
O 3.3393790 3.3181370 2.9097700  
O 1.2798220 -1.1515510 5.7942200  
O -0.0841280 8.1583720 3.9790060  
O 0.7898840 4.6230900 9.5770230  
O 0.4058100 2.3837300 0.1962030  
S 1.0480550 0.2843290 5.3512860  
S 0.1476390 6.7224920 4.4219400
